# Supplementary material
Source: PubMed Central journal article supplement (PMC3149272)
Supplement: mmc1.pdf [file mmc1.pdf]

Supplemental Material  
 Mechanical properties of lens capsule  
 Leanne B Dyksterhuis, Jacinta F White, Mark Hickey, Nigel

Table S1. ANOVA comparison of stresses at 70 % strain for GAG+ and GAG- data. SS deontes sum of squares; df, degrees of freedom; MS, mean of squares; F, F-test statistic and P-value the level of confidence that variation is due to treatment.

| <i>Source of Variation</i>                      | <i>SS</i> | <i>df</i> | <i>MS</i> | <i>F</i> | <i>P-value</i> |
|-------------------------------------------------|-----------|-----------|-----------|----------|----------------|
| Intraspecies (between individuals)              | 1.242     | 9.000     | 0.138     | 4.583    | 0.017          |
| Intrapair (between GAG+ and GAG- matched pairs) | 0.316     | 1.000     | 0.316     | 10.490   | 0.010          |
| Error                                           | 0.271     | 9.000     | 0.030     |          |                |
| Total                                           | 1.828     | 19.000    |           |          |                |

Table S2. ANOVA comparison of stresses at 70 % strain for PBS and SR data. SS deontes sum of squares; df, degrees of freedom; MS, mean of squares; F, F-test statistic and P-value the level of confidence that variation is due to treatment.

| <i>Source of Variation</i>                   | <i>SS</i> | <i>df</i> | <i>MS</i> | <i>F</i> | <i>P-value</i> |
|----------------------------------------------|-----------|-----------|-----------|----------|----------------|
| Intraspecies (between individuals)           | 0.425044  | 11        | 0.03864   | 2.626927 | 0.062093       |
| Interpair (between PBS and SR matched pairs) | 1.16627   | 1         | 1.16627   | 79.28769 | 2.33E-06       |
| Error                                        | 0.161803  | 11        | 0.014709  |          |                |
| Total                                        | 1.753117  | 23        |           |          |                |

Table S3. ANOVA comparison of thicknesses for GAG+ and GAG- lens capsules. SS deontes sum of squares; df, degrees of freedom; MS, mean of squares; F, F-test statistic and P-value the level of confidence that variation is due to treatment.

| <i>Source of Variation</i>                      | <i>S</i> | <i>df</i> | <i>MS</i> | <i>F</i> | <i>P-value</i> |
|-------------------------------------------------|----------|-----------|-----------|----------|----------------|
| Intraspecies (between individuals)              | 729.05   | 9         | 81.00556  | 9.462038 | 0.001287       |
| Interpair (between GAG+ and GAG- matched pairs) | 0.45     | 1         | 0.45      | 0.052563 | 0.823787       |
| Error                                           | 77.05    | 9         | 8.561111  |          |                |

|       |        |    |
|-------|--------|----|
| Total | 806.55 | 19 |
|-------|--------|----|

Table S4. ANOVA comparison of thicknesses for PBS and SR lens capsules. SS denotes sum of squares; df, degrees of freedom; MS, mean of squares; F, F-test statistic and P-value the level of confidence that variation is due to treatment.

| Source of Variation                          | SS       | df | MS       | F        | P-value  |
|----------------------------------------------|----------|----|----------|----------|----------|
| Intraspecies (between individuals)           | 343.4583 | 11 | 31.22348 | 1.716219 | 0.192019 |
| Interpair (between PBS and SR matched pairs) | 30.375   | 1  | 30.375   | 1.669582 | 0.2228   |
| Error                                        | 200.125  | 11 | 18.19318 |          |          |
| Total                                        | 573.9583 | 23 |          |          |          |

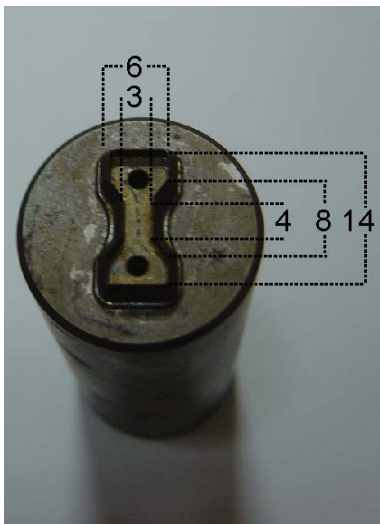

Figure S1. Stainless steel dumbbell-shaped die used for cutting lens capsules.

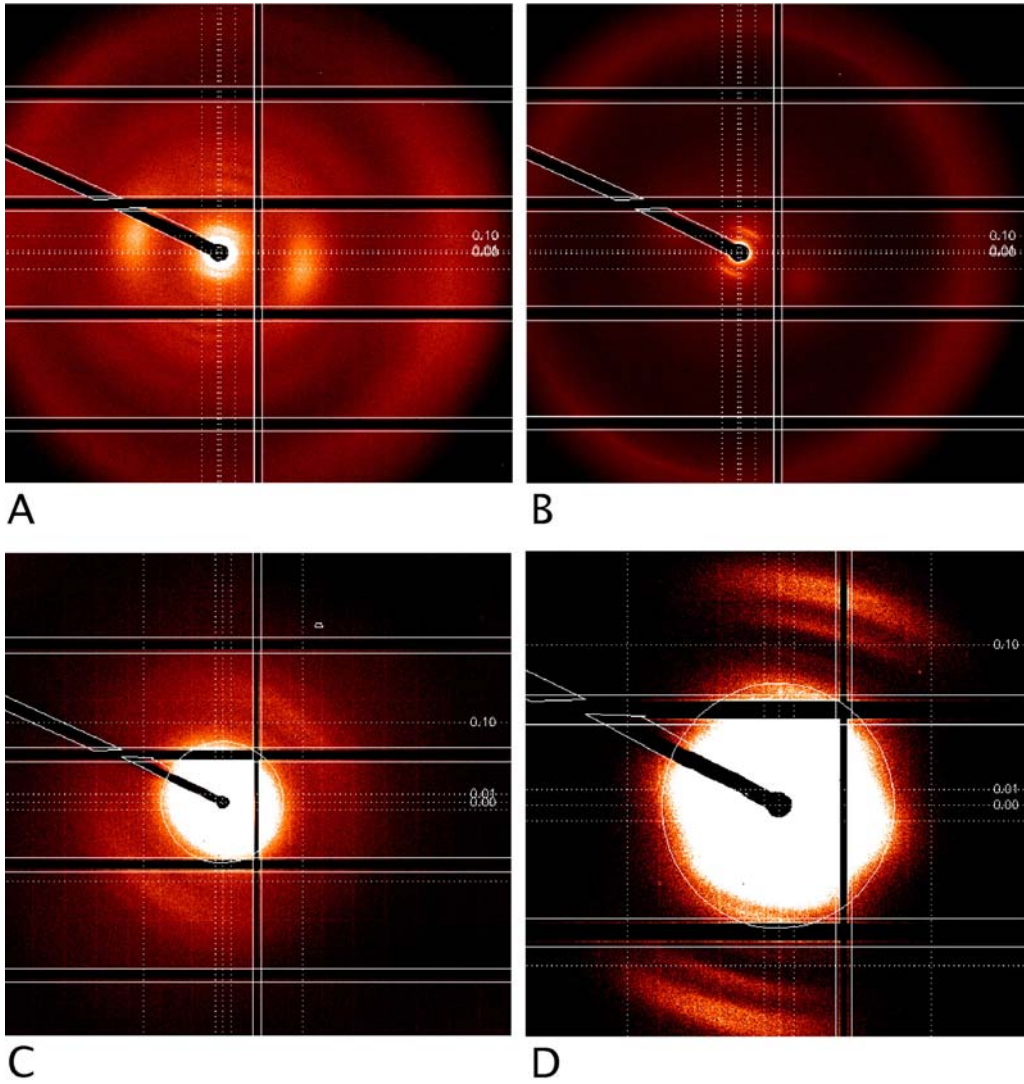

Figure S2. Comparison of packing geometries in control and strongly reduced lens capsules. A. a typical 2D diffraction pattern for PBS lens capsule; B. a typical 2D diffraction pattern for SR lens capsule; C. a typical 2D diffraction pattern for PBS lens capsule at 1336 mm from detector distance; D. a typical 2D diffraction pattern for SR lens capsule at 1336 mm from detector and zoomed in to show detail.
